# Supplementary material for: Genetic Diversity and Geographic Distribution of Cucurbit-Infecting Begomoviruses in the Philippines
Source: MDPI journal article supplement (doi:10.3390/plants12020272), 2023-01-06
Supplement: s1 [file s1]

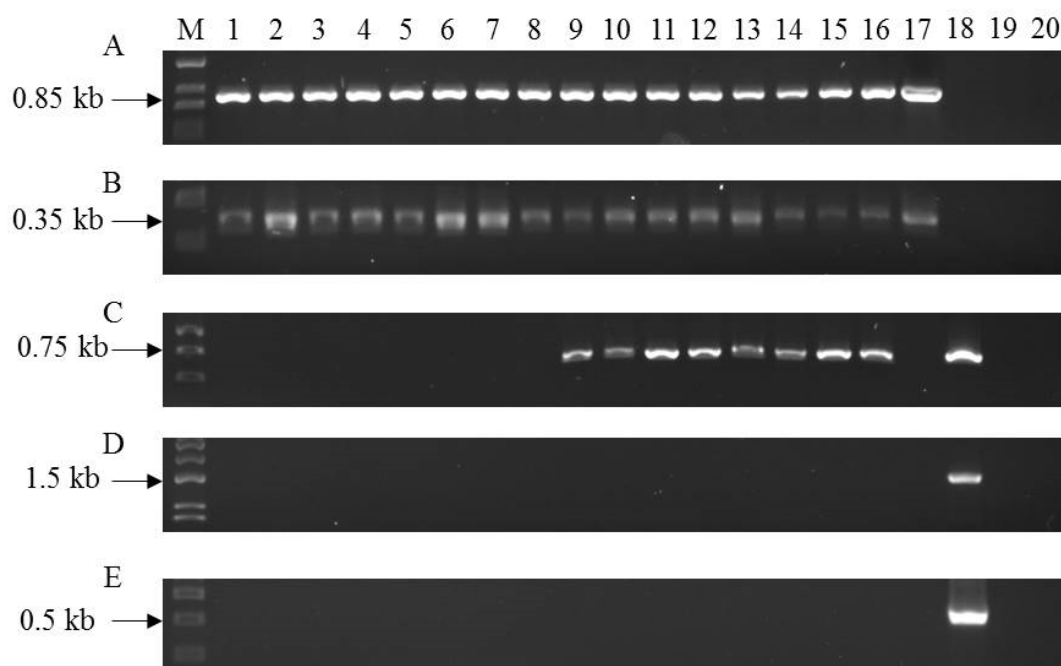

**Figure S1.** 1.2% agarose gel electrophoresis of specific detection of cucurbit-infecting begomoviruses in the Philippines. The virus specific detection was conducted by PCR using the *Squash leaf curl Philippines virus* (SLCuPV) DNA-A specific primer pair-SLCuPV-1-SPAF/-1-SPAC (A), SLCuPV DNA-B specific primer pair-SLCCNV-BV1/SLCuPV-2-SPBC (B), *Squash leaf curl China virus* (SLCCNV) DNA-A specific primer pair-SLCCNV-1-SPAF/-1-SPAC (C), the SLCCNV DNA-B specific primer pair-SLCCNV-BV1/-1-SPBC (D) and SLCCNV-3-SPBV/-3-SPBC (E). Lane M is the DNA molecular 1kb size marker. Lanes 1 to 16 are viral DNAs extracted from symptomatic cucurbit leaf samples Pk76, MM100, WM114, BoG216, Pk98, Cyt131, Pk187, Cyt231, Pk38, Pk129, Pk195, Pk247, BoG18, BoG56, Pk71, Pk212. Lane 17 is viral DNA extracted from a SLCuPV infected pumpkin plant. Lane 18 is viral DNA extracted from a SLCCNV infected pumpkin plant. Lane 19 is a healthy squash. Lane 20 is a buffer control.

**Table S1.** Sequences of primers used in this study.

| Primers                    | Sequence (5' to 3')            | Purpose                                                                                                                                                                                                                                                                                                                                   |
|----------------------------|--------------------------------|-------------------------------------------------------------------------------------------------------------------------------------------------------------------------------------------------------------------------------------------------------------------------------------------------------------------------------------------|
| PALiv1978RYNN <sup>b</sup> | GCATCTGACAGGCCACRYNGTYTTCNCNGT | General detection of begomoviruses DNA-A                                                                                                                                                                                                                                                                                                  |
| PARIc715H <sup>b</sup>     | GATTCTGCAGTTDATRITHCRCCATCCA   | General detection of begomoviruses DNA-A                                                                                                                                                                                                                                                                                                  |
| SLCCNV-BV1 <sup>b</sup>    | GTAATGYTAAATTACATTGG           | General detection of DNA-Bs of SLCuPV and SLCCNV                                                                                                                                                                                                                                                                                          |
| SLCCNV-BC1 <sup>b</sup>    | TYVACKGACGTCGAATTCGA           | General detection of DNA-Bs of SLCuPV and SLCCNV                                                                                                                                                                                                                                                                                          |
| 19PH71-FAV                 | CGCGGATCCACTGTTGCACGAAT        | Full-length DNA-A amplification of 18PH67, 18PH76, 18PH151, 18PH183, 18PH195, 18PH216, 18PH227, 18PH247, 19PH12, 19PH54, 19PH55, 19PH56, 19PH70, 19PH71, 19PH98, 19PH117, 19PH118, 19PH123, 19PH125, 19PH166, 19PH169, 19PH171, 19PH172, 19PH186, 19PH205, 19PH208, 19PH211, 19PH231                                                      |
| 18PH114-FAV                | CACGGATCCACTACTGCACGA          | Full-length DNA-A amplification of 18PH114                                                                                                                                                                                                                                                                                                |
| 19PH131-FAV                | CGAGGATCCACTGTTACACGAAT        | Full-length DNA-A amplification of 19PH131                                                                                                                                                                                                                                                                                                |
| 19PH11-FAV                 | CATGGATCCACTGCTGCACGA          | Full-length DNA-A amplification of 18PH38, 18PH62, 18PH140, 18PH158, 19PH10, 19PH11, 19PH19, 19PH54                                                                                                                                                                                                                                       |
| 19PH117-FAC                | GTAGGATCCACATGTTGTGGATC        | Full-length DNA-A amplification of 18PH67, 18PH76, 18PH151, 18PH183, 18PH195, 18PH216, 18PH227, 18PH247, 19PH12, 19PH54, 19PH55, 19PH70, 19PH71, 19PH98, 19PH117, 19PH118, 19PH125, 19PH131, 19PH166, 19PH169, 19PH171, 19PH172, 19PH186, 19PH205, 19PH208, 19PH211, 19PH231                                                              |
| 18PH114-FAC                | GTAGGATCCACATGTTGTGAATC        | Full-length DNA-A amplification of 18PH114                                                                                                                                                                                                                                                                                                |
| 19PH56-FAC                 | GAAGGATCCACATGTTGTGGATAC       | Full-length DNA-A amplification of 19PH56                                                                                                                                                                                                                                                                                                 |
| 19PH123-FAC                | CTAGGATCCACATGTTGTGGAGC        | Full-length DNA-A amplification of 19PH123                                                                                                                                                                                                                                                                                                |
| 18PH38-FAC                 | GTAGGATCCACATGTTGTGGAC         | Full-length DNA-A amplification of 18PH38, 18PH62, 18PH140, 18PH158, 19PH10, 19PH11, 19PH19, 19PH54                                                                                                                                                                                                                                       |
| 18PH247-5 FAV1             | GACAATGAACCGAGCACTGCA          | For completing DNA-A sequencing of 18PH38, 18PH62, 18PH67, 18PH76, 18PH87, 18PH114, 18PH137, 18PH140, 18PH151, 18PH183, 18PH195, 18PH216, 18PH227, 18PH237, 18PH247, 19PH11, 19PH19, 19PH54, 19PH56, 19PH71, 19PH98, 19PH117, 19PH123, 19PH125, 19PH131, 19PH166, 19PH169, 19PH186, 19PH205, 19PH208, 19PH211, 19PH231                    |
| 18PH247-5 FAC1             | CACATTTCCATCCGAACGTTCA         | For completing DNA-A sequencing of 18PH38, 18PH62, 18PH67, 18PH76, 18PH87, 18PH114, 18PH137, 18PH140, 18PH151, 18PH183, 18PH195, 18PH216, 18PH227, 18PH237, 18PH247, 19PH11, 19PH19, 19PH54, 19PH56, 19PH71, 19PH98, 19PH117, 19PH123, 19PH125, 19PH131, 19PH166, 19PH169, 19PH186, 19PH205, 19PH208, 19PH211, 19PH231                    |
| 18PH216-8 FAC1             | CACATTTCCATCCGAACATTCA         | For completing DNA-A sequencing of 18PH38, 18PH62, 18PH67, 18PH76, 18PH87, 18PH114, 18PH137, 18PH140, 18PH151, 18PH183, 18PH195, 18PH216, 18PH227, 18PH237, 18PH247, 19PH11, 19PH19, 19PH54, 19PH56, 19PH71                                                                                                                               |
| PKB-V                      | GCTCCATGGATTGATCGGTTATCG       | Full-length DNA-B amplification of 18PH62, 18PH67, 18PH76, 18PH87, 18PH100, 18PH102, 18PH114, 18PH137, 18PH151, 18PH183, 18PH216, 18PH227, 18PH237, 18PH247, 18PH248, 19PH12, 19PH19, 19PH54, 19PH56, 19PH71, 19PH98, 19PH117, 19PH123, 19PH125, 19PH131, 19PH166, 19PH169, 19PH186, 19PH187, 19PH205, 19PH208, 19PH211, 19PH212, 19PH231 |
| PKPHB-C                    | GTACCATGGTATTTCGAGATCTG        | Full-length DNA-B amplification of 18PH62, 18PH67, 18PH76, 18PH87, 18PH137, 18PH151, 18PH237, 19PH12, 19PH19, 19PH54, 19PH56, 19PH71, 19PH117, 19PH125, 19PH131, 19PH166, 19PH169, 19PH205, 19PH208                                                                                                                                       |
| PKTWB-C                    | CGTCCATGGCATTTCGAGATC          | Full-length DNA-B amplification of 18PH100, 18PH102, 18PH114, 18PH183, 18PH216, 18PH227, 28PH247, 18PH248, 19PH98, 19PH123, 19PH186, 19PH187, 19PH211, 19PH212, 19PH231                                                                                                                                                                   |
| 19PH11-FBV                 | CGCGTTAACAGTGAATCTTTGCTC       | Full-length DNA-B amplification of 18PH38, 18PH195, 19PH11                                                                                                                                                                                                                                                                                |
| 18PH129-FBC                | CGCGTTAACGACATAGATTCTGGTC      | Full-length DNA-B amplification of 18PH38, 18PH195                                                                                                                                                                                                                                                                                        |

|                 |                            |                                                                                                                                                                                                                  |
|-----------------|----------------------------|------------------------------------------------------------------------------------------------------------------------------------------------------------------------------------------------------------------|
| 19PH11-FBC      | CGCGTTAACGACATCGATTCTGGTC  | Full-length DNA-B amplification of 19PH11                                                                                                                                                                        |
| 18PH76-2 FBV1   | GTATGGTTAAGCGATGTACCT      | For completing DNA-B sequencing of 18PH62, 18PH67, 18PH76, 18PH137, 18PH151, 18PH216, 18PH227, 18PH237, 19PH56, 19PH98, 19PH117, 19PH123, 19PH125, 19PH131, 19PH166, 19PH169, 19PH186, 19PH205, 19PH208, 19PH211 |
| 18PH114-7 FBV1  | GTATGGTTGAGCGATGTACCT      | For completing DNA-B sequencing of 18PH87, 18PH114                                                                                                                                                               |
| 19PH71-7 FBV1   | GTATGGTTAAGTGATGTACCT      | For completing DNA-B sequencing of 19PH19, 19PH54, 19PH71                                                                                                                                                        |
| 19PH231-4 FBV1  | GTATGGTTAAGCGATATACCT      | For completing DNA-B sequencing of 19PH231                                                                                                                                                                       |
| 18PH100-13 FBV1 | AATTACATTGGTTAGTGTAC       | For completing DNA-B sequencing of 18PH100, 18PH102                                                                                                                                                              |
| 19PH205-9 FBV2  | GTAATGCAAATTACAGTTGCATT    | For completing DNA-B sequencing of 19PH169, 19PH205                                                                                                                                                              |
| 19PH56-6 FBV2   | GTAATGCAAATTGCAGTTGCATC    | For completing DNA-B sequencing of 18PH76, 18PH87, 18PH114, 18PH137, 18PH151, 18PH216, 18PH227, 28PH237, 19PH56                                                                                                  |
| 19PH19-7 FBV2   | GACTGCATTATTGGTACTT        | For completing DNA-B sequencing of 19PH19, 19PH54, 19PH71, 19PH125                                                                                                                                               |
| 18PH62-9 FBV2   | GACTGCATTATTGGTACTT        | For completing DNA-B sequencing of 18PH62, 18PH67, 19PH56, 19PH98, 19PH117, 19PH123, 19PH131, 19PH166, 19PH186, 19PH208, 19PH231                                                                                 |
| 18PH38-7 FBV1   | ACGTGCCATGTACTCAGA         | For completing DNA-B sequencing of 18PH38                                                                                                                                                                        |
| 18PH129-4 FBV1  | ACATGCCATGTACTCAGA         | For completing DNA-B sequencing of 18PH195                                                                                                                                                                       |
| 19PH11-2 FBV1   | ACCTATCATGTATCCAGA         | For completing DNA-B sequencing of 19PH11                                                                                                                                                                        |
| 19PH212-17 FBV1 | ACCTATCATGTATCCAGA         | For completing DNA-B sequencing of 19PH212                                                                                                                                                                       |
| 18PH100-FBC1    | TGCCATTAGAGACATACTA        | For completing DNA-B sequencing of 18PH100, 18PH102                                                                                                                                                              |
| 18PH38-7 FBC1   | CACGACAGGCACCTAACAG        | For completing DNA-B sequencing of 18PH38, 18PH195, 19PH11                                                                                                                                                       |
| 19PH212-17 FBC1 | CACGACAGGAACCTAACAG        | For completing DNA-B sequencing of 19PH212                                                                                                                                                                       |
| CAMBIA-V        | TAATAACACATTGCGGACGT       | For confirming the infectious clones                                                                                                                                                                             |
| CAMBIA-C        | AATGTTTGAACGATCGGGGA       | For confirming the infectious clones                                                                                                                                                                             |
| SLCuPV-1-SPAC   | GCTTTAKMWATAATWARRGARGAACT | Specific detection of SLCuPV DNA-A                                                                                                                                                                               |
| SLCuPV-1-SPAF   | CAGGTGTGTTGAACATGATG       | Specific detection of SLCuPV DNA-A                                                                                                                                                                               |
| SLCCNV-1-SPAC   | GCNTTRAARGTRYTRARRGAATTAGC | Specific detection of SLCCNV DNA-A                                                                                                                                                                               |
| SLCCNV-1-SPAF   | ARATCAATDCGTCKDCGYCTG      | Specific detection of SLCCNV DNA-A                                                                                                                                                                               |
| SLCuPV-2-SPBC   | CAYAGTTCAAGATCVTTGC        | Specific detection of SLCuPV DNA-B                                                                                                                                                                               |
| SLCCNV-1-SPBC   | CTMTAWRGATATWTATAAGAC      | Specific detection of SLCCNV DNA-B                                                                                                                                                                               |
| SLCCNV-3-SPBV   | GDGTCCTATAWATACCTT         | Specific detection of SLCCNV DNA-B                                                                                                                                                                               |
| SLCCNV-3-SPBC   | RTCGTCTYSCHGGAGTAT         | Specific detection of SLCCNV DNA-B                                                                                                                                                                               |

<sup>a</sup>B=C, G, T; D=A, G, T; H=A, C, T; K=G, T; M=A, C; N=A, T, G, C; R=A, G; S=C, G; V=A, C, G; W=A, T; Y=C, T.

<sup>b</sup>Primers were published in [15].

**Table S2.** The sequences of begomoviral DNAs used in this study.

| Viruses                                                                          | Abbreviation                  | GenBank accession |          |
|----------------------------------------------------------------------------------|-------------------------------|-------------------|----------|
|                                                                                  |                               | DNA-A             | DNA-B    |
| <i>Squash leaf curl China virus</i> pumpkin isolate from Thailand                | SLCCNV-[TH]                   | AB330078          |          |
| <i>Squash leaf curl China virus</i> B isolate of cucurbits from Vietnam          | SLCCNV-[VN-B]                 | AF509743          | AF509742 |
| <i>Squash leaf curl China virus</i> Hn61 isolate of squash from China            | SLCCNV-[CN-Hn61-Sq]           | AM260205          | AM260207 |
| <i>Squash leaf curl China virus</i> G25 isolate of squash from China             | SLCCNV-[CN-G25]               | AM260206          | AM260208 |
| <i>Squash leaf curl China virus</i> MC1 isolate of cucumber from Malaysia        | SLCCNV-[MY-MC1-Cu-01]         | EF197940          |          |
| <i>Squash leaf curl China virus</i> P54 isolate of chayote from Philippines      | SLCCNV-[PH-P54-Cyt-06]        | EU487031          |          |
| <i>Squash leaf curl China virus</i> melon isolate from China                     | SLCCNV-[CN-Me-10]             | HM566112          | HM566113 |
| <i>Squash leaf curl China virus</i> GZ01 isolate of squash from China            | SLCCNV-[CN-GZ01-Sq-11]        | KC171648          | KC171649 |
| <i>Squash leaf curl China virus</i> Hanoi isolate of squash from Vietnam         | SLCCNV-[VN-Hanoi-Sq-12]       | KC857509          | KC857510 |
| <i>Squash leaf curl China virus</i> SY isolate of squash from China              | SLCCNV-[CN-SY-Sq-13]          | KF999983          | KF999984 |
| <i>Squash leaf curl China virus</i> T4D isolate of pumpkin from Timor-Leste      | SLCCNV-[TL-T4D-15]            | KY652743          |          |
| <i>Squash leaf curl China virus</i> squash isolate from Indonesia                | SLCCNV-[ID-BASq-17]           | LC511776          | LC511781 |
| <i>Squash leaf curl China virus</i> Guangxi2017 isolate of Squash from China     | SLCCNV-[CN-Guangxi2017-Sq-17] | MG525551          | MG525552 |
| <i>Squash leaf curl China virus</i> KN44 isolate of pumpkin from Thailand        | SLCCNV-[TH-KN44-Pk-18]        | MK978176          | MK978177 |
| <i>Squash leaf curl China virus</i> YN4560 isolate of pumpkin from China         | SLCCNV-[CN-YN4560-Pk-14]      | MN218672          |          |
| <i>Squash leaf curl China virus</i> KN42A isolate of pumpkin from Thailand       | SLCCNV-[TH-KN42A-Pk-16]       | MN365018          |          |
| <i>Squash leaf curl China virus</i> KN52A isolate of pumpkin from Thailand       | SLCCNV-[TH-KN52A-Pk-16]       | MN437659          |          |
| <i>Squash leaf curl China virus</i> 16MY3 isolate of squash from Malaysia        | SLCCNV-[MY-Sq3-5-16]          | MW248679          | MW248668 |
| <i>Squash leaf curl China virus</i> 16MY5 isolate of bottle gourd from Malaysia  | SLCCNV-[MY-BoG5-17]           | MW248682          | MW248683 |
| <i>Squash leaf curl China virus</i> 17MY107 isolate of squash from Malaysia      | SLCCNV-[MY-Sq107-17]          | MW248685          | MW248686 |
| <i>Squash leaf curl China virus</i> 17MY115 isolate of squash from Malaysia      | SLCCNV-[MY-Sq115-17]          | MW248687          | MW248688 |
| <i>Squash leaf curl China virus</i> 17MY157 isolate of squash from Malaysia      | SLCCNV-[MY-Sq157-17]          | MW248689          | MW248690 |
| <i>Squash leaf curl China virus</i> GDFS isolate of pumpkin from China           | SLCCNV-[CN-GDFS-Pk-19]        | MW389915          | MW389916 |
| <i>Squash leaf curl Philippines virus</i> squash isolate from Philippines        | SLCuPV-[PH-Pk]                | AB085793          | AB085794 |
| <i>Squash leaf curl Philippines virus</i> PA1 isolate of pumpkin from Taiwan     | SLCuPV-[TW-PA1-Pk]            | DQ866135          |          |
| <i>Squash leaf curl Philippines virus</i> Wg1 isolate of wax gourd from Taiwan   | SLCuPV-[TW-Wg1-06]            | EU310406          |          |
| <i>Squash leaf curl Philippines virus</i> YL isolate from Taiwan                 | SLCuPV-[TW-YL]                | EU479710          | EU479711 |
| <i>Squash leaf curl Philippines virus</i> P88 isolate of squash from Philippines | SLCuPV-[PH-P88-Sq-06]         | EU487033          |          |
| <i>Squash leaf curl Philippines virus</i> 1-1 isolate of chayote from Taiwan     | SLCuPV-[TW-1-1-Cyt-10]        | JF746195          | JF746196 |

|                                                                                       |                           |          |          |
|---------------------------------------------------------------------------------------|---------------------------|----------|----------|
| <i>Squash leaf curl Yunnan virus</i> Y23 isolate of cucurbit from China               | SLCuYINV-[CN-Y23]         | AJ420319 |          |
| <i>Tomato leaf curl New Delhi virus</i> melon isolate from Taiwan                     | ToLCNDV-[TW-OM-07]        | GU180095 | GU180096 |
| <i>Tomato leaf curl New Delhi virus</i> cucumber isolate from Indonesia               | ToLCNDV-[ID-BACu-20]      | LC511775 | LC511780 |
| <i>Tomato leaf curl New Delhi virus</i> luffa isolate from Indonesia                  | ToLCNDV-[ID-JV-Luf-17]    | LC431619 | LC431620 |
| <i>Tomato leaf curl New Delhi virus</i> luffa isolate from Laos                       | ToLCNDV-[LA-Q6440-Luf-15] | MH328254 |          |
| <i>Tomato leaf curl New Delhi virus</i> cucumber isolate from Thailand                | ToLCNDV-[TH-CB-Cu]        | MK883715 | MK883716 |
| <i>Tomato leaf curl New Delhi virus</i> 16MY1 isolate of oriental melon from Malaysia | ToLCNDV-[MY-OM1-16]       | MT912475 | MT912476 |
| <i>Melon yellow mosaic virus</i> Me-MS-9 isolate of melon from Thailand               | MeYMV-[TH-Me-Ms-9-15]     | MH665365 |          |
| <i>Lisianthus enation leaf curl virus</i> DC-1 isolate of pumpkin from Taiwan         | LELCV-[TW-DC-1-Pk-16]     | MN692224 |          |
| Pumpkin yellow mosaic Malaysia virus MP1 isolate of pumpkin from Malaysia             | PuYMMYV-[MY-MP1-Pk-01]    | EF197941 |          |
| <i>Loofa yellow mosaic virus</i> luffa isolate from Vietnam                           | LYMV-[VN-Luf]             | AF509739 | AF509740 |
| <i>Squash leaf curl virus</i>                                                         | SLCV-[USA]                | M38183   | M38182   |

**Table S3.** Sequence characteristics of cucurbit-infecting begomovirus DNAs identified in this study.

| Island            | Province               | Virus isolates                        | Length,<br>nt | DNA-A ORF regions, nt |          |           |           |           |           |           |          | Accessions | Length,<br>nt | DNA-B ORF regions, nt |           |            |  |
|-------------------|------------------------|---------------------------------------|---------------|-----------------------|----------|-----------|-----------|-----------|-----------|-----------|----------|------------|---------------|-----------------------|-----------|------------|--|
|                   |                        |                                       |               | IR                    | AV2      | AV1       | AC1       | AC2       | AC3       | AC4       | IR       |            |               | BV1                   | BC1       | Accessions |  |
| Luzon             | Quezon                 | SLCCNV-A[PH-Pk38-18]                  | 2752          | 2601-135              | 136-474  | 296-1066  | 2600-1515 | 1612-1208 | 1473-1063 | 2443-2267 | OP771610 |            |               |                       |           |            |  |
|                   |                        | SLCuPV-A[PH-Pk38-18]                  |               |                       |          |           |           |           |           |           |          | 2719       | 2182-475      | 476-1282              | 2181-1336 | OP771615   |  |
|                   | Cavite                 | SLCuPV-A[PH-Pk62-18]                  | 2765          | 2601-135              | 136-474  | 296-1066  | 2600-1515 | 1612-1208 | 1473-1063 | 2443-2186 | OP771541 | 2720       | 2182-475      | 476-1282              | 2181-1336 | OP771576   |  |
|                   |                        | SLCuPV-A[PH-BoG67-18]                 | 2748          | 2584-118              | 119-457  | 279-1049  | 2583-1519 | 1595-1191 | 1456-1046 | 2426-2169 | OP771542 | 2719       | 2182-475      | 476-1282              | 2181-1336 | OP771577   |  |
|                   | Bulacan                | SLCuPV-B[PH-Pk76-18]                  | 2746          | 2584-118              | 119-457  | 279-1049  | 2583-1498 | 1595-1191 | 1456-1046 | 2426-2169 | OP771543 | 2717       | 2195-474      | 475-1281              | 2196-1336 | OP771578   |  |
|                   |                        | SLCuPV-B[PH-BoG87-18]                 | 2763          | 2584-118              | 119-457  | 279-1049  | 2583-1498 | 1456-1046 | 1595-1191 | 2426-2169 | OP771544 | 2732       | 2195-473      | 474-1280              | 2194-1334 | OP771579   |  |
|                   | Nueva Ecija            | SLCuPV-B[PH-MM100-18]                 | 2747          | 2585-119              | 120-458  | 280-1050  | 2584-1514 | 1457-1047 | 1596-1192 | 2427-2170 | OP771545 | 2714       | 2180-473      | 474-1280              | 2179-1334 | OP771580   |  |
|                   |                        | SLCuPV-B[PH-MM102-18]                 | 2745          | 2583-117              | 118-456  | 278-1048  | 2582-1497 | 1594-1190 | 1455-1045 | 2425-2168 | OP771546 | 2732       | 2195-473      | 474-1280              | 2194-1334 | OP771581   |  |
|                   | Nueva Vizcaya          | SLCuPV-B[PH-WM114-18]                 | 2746          | 2584-118              | 119-457  | 279-1049  | 2583-1498 | 1595-1191 | 1456-1046 | 2426-2169 | OP771547 | 2732       | 2195-473      | 474-1280              | 2194-1334 | OP771582   |  |
|                   |                        | SLCuPV-A[PH-BoG137-18]                | 2748          | 2584-118              | 119-457  | 279-1049  | 2583-1498 | 1595-1191 | 1456-1046 | 2426-2169 | OP771548 | 2717       | 2197-475      | 476-1282              | 2196-1336 | OP771583   |  |
|                   | Luzon                  | SLCCNV-A[PH-Pk140-18]                 | 2752          | 2601-135              | 136-474  | 296-1066  | 2600-1515 | 1612-1208 | 1473-1063 | 2443-2267 | OP771611 |            |               |                       |           |            |  |
|                   |                        | SLCuPV-A[PH-Pk140-18]                 |               |                       |          |           |           |           |           |           |          | 2721       | 2197-475      | 476-1282              | 2196-1336 | OP771616   |  |
|                   | Ilocos Sur             | SLCuPV-A[PH-Pk151-18]                 | 2734          | 2584-118              | 119-457  | 279-1049  | 2583-1498 | 1595-1191 | 1456-1046 | 2426-2169 | OP771549 | 2719       | 2198-475      | 476-1282              | 2197-1337 | OP771584   |  |
|                   |                        | SLCuPV-A[PH-BoG183-18]                | 2736          | 2585-118              | 120-458  | 280-1050  | 2584-1499 | 1596-1192 | 1457-1047 | 2427-2170 | OP771550 | 2693       | 2153-446      | 447-1253              | 2152-1307 | OP771585   |  |
|                   |                        | SLCCNV-A[PH-Pk195-18]                 | 2752          | 2601-135              | 136-474  | 296-1066  | 2600-1515 | 1612-1208 | 1473-1063 | 2443-2267 | OP771612 |            |               |                       |           |            |  |
|                   |                        | SLCuPV-A[PH-Pk195-18]                 |               |                       |          |           |           |           |           |           |          | 2640       | 2114-392      | 393-1199              | 2113-1253 | OP771617   |  |
|                   | La Unión               | SLCuPV-B[PH-BoG216-18]                | 2743          | 2584-118              | 119-457  | 279-1049  | 2583-1498 | 1595-1191 | 1456-1046 | 2426-2169 | OP771551 | 2703       | 2181-475      | 476-1282              | 2180-1335 | OP771586   |  |
|                   |                        | SLCuPV-A[PH-BoG227-18]                | 2747          | 2584-118              | 119-457  | 279-1049  | 2583-1498 | 1595-1191 | 1456-1046 | 2426-2169 | OP771552 | 2712       | 2180-474      | 475-1281              | 2179-1334 | OP771587   |  |
|                   | Pangasinana            | SLCuPV-A[PH-BoG237-18]                | 2747          | 2584-118              | 119-457  | 279-1049  | 2583-1498 | 1595-1191 | 1456-1046 | 2426-2169 | OP771553 | 2705       | 2181-475      | 476-1282              | 2180-1335 | OP771588   |  |
|                   |                        | SLCuPV-A[PH-Pk247-18]                 | 2747          | 2584-118              | 119-457  | 279-1049  | 2583-1498 | 1595-1191 | 1456-1046 | 2426-2169 | OP771554 | 2713       | 2180-474      | 475-1281              | 2179-1334 | OP771589   |  |
|                   | Tarlac                 | SLCuPV-A[PH-Pk248-18]                 | 2749          | 2584-118              | 119-457  | 279-1049  | 2583-1498 | 1595-1191 | 1456-1046 | 2426-2169 | OP771555 | 2713       | 2181-475      | 476-1282              | 2180-1335 | OP771590   |  |
| Negros Occidental | SLCCNV-A[PH-Pk11-19]   | 2752                                  | 2601-135      | 136-474               | 296-1066 | 2600-1515 | 1612-1208 | 1473-1063 | 2443-2267 | OP771613  |          |            |               |                       |           |            |  |
|                   | SLCuPV-A[PH-Pk11-19]   |                                       |               |                       |          |           |           |           |           |           | 2722     | 2179-472   | 473-1279      | 2178-1333             | OP771618  |            |  |
|                   | SLCuPV-A[PH-Pk12-19]   | 2750                                  | 2592-120      | 121-459               | 281-1051 | 2591-1500 | 1597-1193 | 1458-1048 | 2428-2171 | OP771556  | 2724     | 2181-474   | 475-1281      | 2180-1335             | OP771591  |            |  |
|                   | SLCuPV-A[PH-BoG19-19]  | 2764                                  | 2601-135      | 136-474               | 296-1066 | 2600-1515 | 1612-1208 | 1473-1063 | 2443-2186 | OP771557  | 2717     | 2176-469   | 470-1276      | 2175-1330             | OP771592  |            |  |
|                   | SLCuPV-A[PH-BoG54-19]  | 2748                                  | 2584-118      | 119-457               | 279-1049 | 2583-1498 | 1595-1191 | 1456-1046 | 2426-2169 | OP771558  | 2723     | 2182-474   | 475-1281      | 2181-1336             | OP771593  |            |  |
|                   | SLCuPV-A[PH-BoG56-19]  | 2748                                  | 2584-118      | 119-457               | 279-1049 | 2583-1498 | 1595-1191 | 1456-1046 | 2426-2169 | OP771559  | 2720     | 2180-473   | 474-1280      | 2179-1334             | OP771594  |            |  |
|                   | SLCuPV-A[PH-Pk71-19]   | 2749                                  | 2585-119      | 120-458               | 280-1050 | 2584-1499 | 1596-1192 | 1457-1047 | 2427-2170 | OP771560  | 2723     | 2181-474   | 475-1281      | 2180-1335             | OP771595  |            |  |
|                   | SLCuPV-A[PH-Pk98-19]   | 2748                                  | 2584-118      | 119-457               | 279-1049 | 2583-1498 | 1595-1191 | 1456-1046 | 2426-2169 | OP771561  | 2721     | 2182-476   | 477-1283      | 2181-1336             | OP771596  |            |  |
|                   | SLCuPV-A[PH-Pk117-19]  | 2747                                  | 2583-117      | 118-456               | 278-1048 | 2582-1497 | 1594-1190 | 1455-1045 | 2425-2168 | OP771562  | 2721     | 2181-475   | 476-1282      | 2180-1335             | OP771597  |            |  |
|                   | SLCuPV-A[PH-Cyt123-19] | 2722                                  | 2584-118      | 119-457               | 279-1049 | 2583-1498 | 1595-1191 | 1456-1046 | 2426-2169 | OP771563  | 2722     | 2181-475   | 476-1285      | 2180-1335             | OP771598  |            |  |
| Mindanao          | Davao del Sur          | SLCuPV-A[PH-Pk125-19]                 | 2748          | 2584-118              | 119-457  | 279-1049  | 2583-1498 | 1595-1191 | 1456-1046 | 2426-2169 | OP771564 | 2714       | 2175-469      | 470-1276              | 2174-1329 | OP771599   |  |
|                   |                        | SLCuPV-A[PH-Cyt131-19]                | 2748          | 2584-118              | 119-457  | 279-1049  | 2583-1498 | 1595-1191 | 1456-1046 | 2426-2169 | OP771565 | 2721       | 2181-475      | 476-1282              | 2180-1335 | OP771600   |  |
|                   | Bukidnon               | SLCuPV-A[PH-Pk166-19]                 | 2748          | 2584-118              | 119-457  | 279-1049  | 2583-1498 | 1595-1191 | 1456-1046 | 2426-2169 | OP771566 | 2723       | 2182-476      | 477-1283              | 2181-1336 | OP771601   |  |
|                   |                        | SLCuPV-A[PH-Pk169-19]                 | 2747          | 2584-118              | 119-457  | 279-1049  | 2583-1498 | 1595-1191 | 1456-1046 | 2426-2169 | OP771567 | 2724       | 2183-477      | 478-1284              | 2182-1337 | OP771602   |  |
|                   |                        | SLCuPV-A[PH-Pk186-19]                 | 2748          | 2584-118              | 119-457  | 279-1049  | 2583-1498 | 1595-1191 | 1456-1046 | 2426-2169 | OP771568 | 2723       | 2182-476      | 477-1283              | 2181-1336 | OP771603   |  |
|                   |                        | SLCuPV-A[PH-Pk187-19]                 | 2748          | 2584-118              | 119-457  | 279-1049  | 2583-1498 | 1595-1191 | 1456-1046 | 2426-2169 | OP771569 | 2722       | 2181-475      | 476-1282              | 2180-1335 | OP771604   |  |
|                   |                        | SLCuPV-A[PH-Pk205-19]                 | 2748          | 2584-118              | 119-457  | 279-1049  | 2583-1498 | 1595-1191 | 1456-1046 | 2426-2169 | OP771571 | 2724       | 2183-477      | 478-1284              | 2182-1337 | OP771605   |  |
|                   |                        | SLCuPV-A[PH-Pk208-19]                 | 2748          | 2584-118              | 119-457  | 279-1049  | 2583-1498 | 1595-1191 | 1456-1046 | 2426-2169 | OP771572 | 2721       | 2181-475      | 476-1282              | 2180-1335 | OP771606   |  |
|                   |                        | SLCuPV-A[PH-Pk211-19]                 | 2750          | 2586-120              | 121-459  | 281-1051  | 2585-1500 | 1597-1193 | 1458-1048 | 2428-2171 | OP771573 | 2722       | 2181-475      | 476-1282              | 2180-1335 | OP771607   |  |
|                   |                        | SLCuPV-A[PH-Pk212-41-19] <sup>a</sup> | 2747          | 2583-117              | 118-456  | 278-1048  | 2582-1497 | 1594-1190 | 1455-1045 | 2425-2168 | OP771574 | 2724       | 2183-477      | 478-1284              | 2182-1337 | OP771608   |  |
|                   |                        | SLCCNV-A[PH-Pk212-42-19] <sup>a</sup> | 2741          | 2586-120              | 121-459  | 281-1051  | 2585-1500 | 1597-1193 | 1458-1048 | 2428-2252 | OP771614 |            |               |                       |           |            |  |
|                   |                        | SLCuPV-A[PH-Pk212-42-19]              |               |                       |          |           |           |           |           |           |          | 2724       | 2183-477      | 478-1284              | 2182-1337 | OP771619   |  |
|                   |                        | SLCuPV-A[PH-Cyt231-19]                | 2748          | 2584-118              | 119-457  | 279-1049  | 2583-1498 | 1595-1191 | 1456-1046 | 2426-2169 | OP771575 | 2723       | 2182-476      | 477-1283              | 2181-1336 | OP771609   |  |

<sup>a</sup> The begomovirus DNA-B was identified in same sample. SLCCNV: *Squash leaf curl China virus*; SLCuPV: *Squash leaf curl Philippines virus*.
